# Supplementary material for: Brief communication: Effective earthquake early warning systems: appropriate messaging and public awareness roles
Source: Copernicus journal article supplement (doi:10.5194/nhess-21-3243-2021), 2021-10-29
Supplement: Supplementary file 1 [file nhess-21-3243-2021-supplement.pdf]

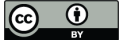

*Supplement of*

**Brief communication: Effective earthquake early warning systems: appropriate messaging and public awareness roles**

**Meng Zhang et al.**

*Correspondence to:* Ya Tang (tangya@scu.edu.cn)

The copyright of individual parts of the supplement might differ from the article licence.

## Supplementary information I: Questionnaire on public's perception of the broadcast siren during the Changning Earthquake

| Question type                                       | English & Chinese Questions 中英采访问题 |                                                                                                                                                                                                                    |
|-----------------------------------------------------|------------------------------------|--------------------------------------------------------------------------------------------------------------------------------------------------------------------------------------------------------------------|
| Demographics<br>人口统计特征                              | Q1                                 | <i>What's your gender?</i> 请问您的性别是_____                                                                                                                                                                            |
|                                                     | Q2                                 | <i>When were you born?</i><br>请问您的出生年份是_____                                                                                                                                                                       |
|                                                     | Q3                                 | <i>What is your education level?</i><br>请问您的受教育程度是____                                                                                                                                                             |
|                                                     | Q4                                 | <i>What is your occupation?</i><br>请问您所从事的职业是____                                                                                                                                                                  |
| Knowledge on earthquakes and their risks<br>地震科普和教育 | Q5                                 | <i>Prior to this survey, did you receive training or were you educated about earthquakes and their risks (e.g., school, company, and community)?</i><br>您是否在学校、单位或社区接受过应对地震的科普教育?                                  |
|                                                     | Q6                                 | <i>Prior to this survey, did you actively learn earthquake knowledge (e.g., risk, preparedness, and protective actions during shaking)?</i><br>您是否主动学习过应对地震的科普/专业知识?                                               |
| Responses to the Changning Earthquake<br>对长宁地震的反应   | Q7                                 | <i>Did you hear the countdown of the broadcast siren on June 17, 2019? (Yes, please jump to Q9)</i><br>6月17日您是否在成都听到地震的“大喇叭”倒计时预警?                                                                                 |
|                                                     | Q8                                 | <i>If you did not hear the siren, please find the 10 s broadcast by scanning the QR code below. How did you feel when you hear the broadcast siren?</i><br>若您没有于6月17日听到了广播,请扫描二维码获取10秒预警音频。设想您是第一次听到“大喇叭”预警,您的反应是? |
|                                                     | Q9                                 | <i>Where were you at warning time?</i><br>您当时所在的位置: _____ (请尽可能详细)                                                                                                                                                 |
|                                                     | Q10                                | <i>How did you feel when you hear the broadcast siren?</i><br>您听到广播的第一反应是?                                                                                                                                         |
| Reasons for the responses<br>不同反应的原因                | Q11                                | <i>How did you know the broadcast siren indicating the coming of an earthquake?</i><br>您通过广播知道将要发生地震的原因是?                                                                                                          |

## Supplementary information II

Table S1. Differences of responses and knowledge of the EEWS by location, gender, age, educational level and occupation (%)

|                                                                             | Location <sup>a</sup> |        | Gender <sup>a</sup> |        | Age <sup>a</sup> |       |       |       |      | Educational level <sup>a</sup> |             |               |          | Occupation <sup>a</sup>                    |                            |                                    |                            |       |
|-----------------------------------------------------------------------------|-----------------------|--------|---------------------|--------|------------------|-------|-------|-------|------|--------------------------------|-------------|---------------|----------|--------------------------------------------|----------------------------|------------------------------------|----------------------------|-------|
|                                                                             | Chengdu               | Others | Male                | Female | ≤ 18             | 19-30 | 31-40 | 41-60 | >60  | Primary & below                | High school | Undergraduate | Graduate | Students, educational employees, academics | Governmental organizations | Emergency institutions & companies | Private business & farmers | Other |
| <b>Response <sup>b</sup></b>                                                |                       |        |                     |        |                  |       |       |       |      |                                |             |               |          |                                            |                            |                                    |                            |       |
| Understood but did not know how to react                                    | 6.1                   | 12.4   | 6.8                 | 7.1    | 0.0              | 4.4   | 7.7   | 11.4  | 7.0  | 7.1                            | 4.3         | 6.3           | 9.9      | 9.7                                        | 3.2                        | 4.1                                | 8.6                        | 4.2   |
| Understood & knew how to react                                              | 28.6                  | 26.5   | 38.6                | 24.2   | 40               | 30.9  | 22.4  | 32.1  | 38.6 | 39.3                           | 31.9        | 28.7          | 24.2     | 27.4                                       | 40.5                       | 31.0                               | 25.1                       | 25.2  |
| Not understood & confused                                                   | 23.1                  | 21.2   | 23.2                | 22.7   | 0.0              | 17.6  | 24.2  | 27.3  | 22.9 | 25.0                           | 34.8        | 21.0          | 23.1     | 20.4                                       | 27.6                       | 19.3                               | 22.6                       | 25.9  |
| Not understood & scared                                                     | 20.7                  | 21.2   | 11.8                | 24.4   | 20.0             | 26.0  | 24.2  | 14.5  | 4.3  | 7.1                            | 11.6        | 23            | 20.3     | 25.8                                       | 13.0                       | 26.2                               | 19.3                       | 20.1  |
| Not understood but felt nothing terrible would happen                       | 13.7                  | 13.3   | 12.7                | 14.0   | 20.0             | 11.3  | 15.0  | 14.5  | 11.4 | 7.1                            | 8.7         | 13.6          | 16.5     | 8.6                                        | 9.2                        | 12.8                               | 17.4                       | 17.9  |
| Others                                                                      | 7.8                   | 5.3    | 6.8                 | 7.6    | 20               | 9.8   | 6.4   | 4.2   | 11.4 | 14.3                           | 8.7         | 7.3           | 6.0      | 8.1                                        | 6.5                        | 6.6                                | 6.9                        | 6.7   |
| <b>Awareness <sup>c</sup></b>                                               |                       |        |                     |        |                  |       |       |       |      |                                |             |               |          |                                            |                            |                                    |                            |       |
| <i>Respondents had actively/proactively obtained education <sup>d</sup></i> |                       |        |                     |        |                  |       |       |       |      |                                |             |               |          |                                            |                            |                                    |                            |       |
| No                                                                          | 32                    | 37.2   | 31.8                | 33.1   | 0                | 19.1  | 36.8  | 41.8  | 34.3 | 57.1                           | 24.6        | 22            | 18.7     | 19.7                                       | 21.6                       | 15.2                               | 25.4                       | 32    |
| Yes                                                                         | 68                    | 62.8   | 68.2                | 66.9   | 100              | 80.9  | 63.2  | 58.2  | 65.7 | 42.9                           | 75.4        | 78            | 81.3     | 80.3                                       | 78.4                       | 84.8                               | 74.6                       | 68    |
| <i>Respondents had received training <sup>e</sup></i>                       |                       |        |                     |        |                  |       |       |       |      |                                |             |               |          |                                            |                            |                                    |                            |       |
| No                                                                          | 21.5                  | 30.1   | 21.8                | 23.1   | 20.0             | 27.5  | 20.9  | 20.6  | 22.9 | 57.1                           | 40.6        | 30.5          | 31.9     | 27.8                                       | 21.6                       | 22.4                               | 35.6                       | 21.5  |
| Yes                                                                         | 78.5                  | 69.9   | 78.2                | 76.9   | 80.0             | 72.5  | 79.1  | 79.4  | 77.1 | 42.9                           | 59.4        | 69.5          | 68.1     | 72.2                                       | 78.4                       | 77.6                               | 64.4                       | 78.5  |

<sup>a</sup> Percentages (%) are given within location, gender, age, educational level, and occupation.

<sup>b</sup> Location:  $\chi^2 = 6.566$ ,  $df=5$ ,  $p=0.255$ ; gender:  $\chi^2 = 23.859$ ,  $df=5$ ,  $p<0.001$ ; age:  $\chi^2 = 43.327$ ,  $df=20$ ,  $p=0.002$ ; educational level:  $\chi^2 = 49.108$ ,  $df=15$ ,  $p<0.001$ ; occupation:  $\chi^2 = 85.205$ ,  $df=20$ ,  $p<0.001$

<sup>c</sup> Knowledge on how to response by asking whether respondents had received training and/or actively/proactively obtained education

<sup>d</sup> Location:  $\chi^2 = 1.186$ ,  $df=1$ ,  $p=0.276$ ; gender:  $\chi^2 = 0.116$ ,  $df=1$ ,  $p=0.734$ ; age:  $\chi^2 = 28.333$ ,  $df=4$ ,  $p<0.001$ ; educational level:  $\chi^2 = 46.303$ ,  $df=4$ ,  $p<0.001$ ; occupation:  $\chi^2 = 14.243$ ,  $df=3$ ,  $p=0.003$

<sup>e</sup> Location:  $\chi^2 = 4.086$ ,  $df=1$ ,  $p=0.043$ ; gender:  $\chi^2 = 0.145$ ,  $df=1$ ,  $p=0.703$ ; age:  $\chi^2 = 3.685$ ,  $df=4$ ,  $p=0.45$ ; educational level:  $\chi^2 = 25.480$ ,  $df=3$ ,  $p<0.001$ ; occupation:  $\chi^2 = 19.283$ ,  $df=4$ ,  $p=0.001$
